# Supplementary material
Source: Springer Nature journal article supplement (http://www.springermedizin.de/resource/supplementary/12943_2013_1132_MOESM7_ESM.pdf/9552570)

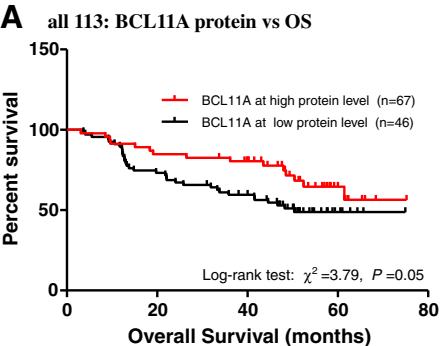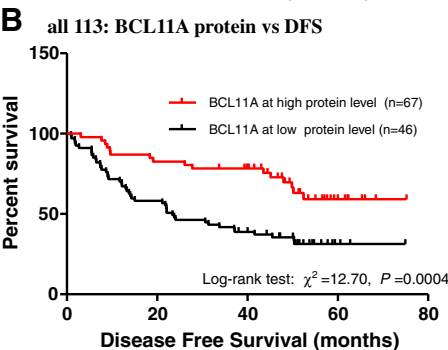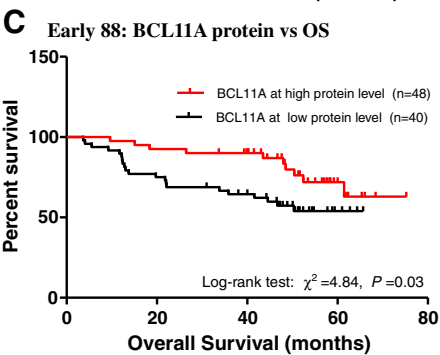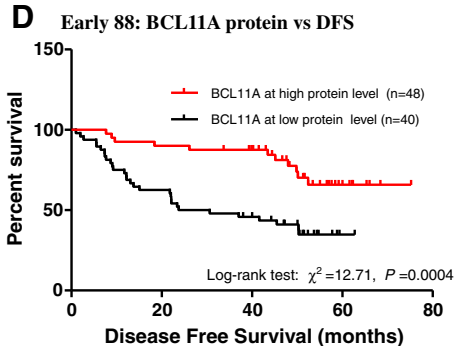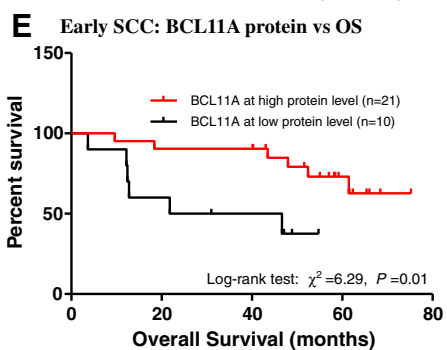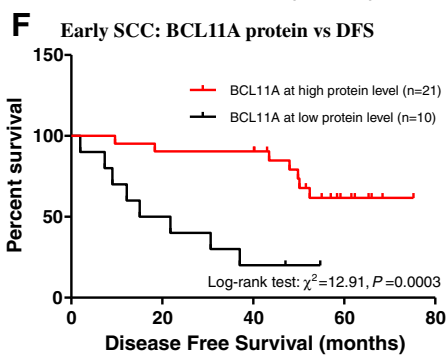

Supplement: MOESM7 [file 9552570]
